# Supplementary material
Source: PubMed Central journal article supplement (PMC5097697)
Supplement: NIHMS824566-supplement.pdf [file NIHMS824566-supplement.pdf]

## Supplementary Data

### HPLC-based kinetics assay facilitates analysis of systems with multiple reaction products and thermal enzyme denaturation

Klingaman, Chase A.<sup>1†</sup>; Wagner, Matthew, J.<sup>1†</sup>; Brown, Justin R.<sup>1‡</sup>; Klecker, John B.<sup>1‡</sup>; Pauley, Ethan H.<sup>1</sup>; Noldner, Colin J.<sup>1</sup>; Mays, Jared R.<sup>1\*</sup>

<sup>1</sup> Augustana University, Department of Chemistry, 2001 S. Summit Ave., Sioux Falls, SD 57197, Phone: 605-274-4815,

Fax: 605-274-4492, Email: [jmays@augie.edu](mailto:jmays@augie.edu)

\* Corresponding author

† These authors contributed equally to this work

‡ These authors contributed equally to this work

#### Table of Contents

|                                                                                                                                     | <b>Page</b> |
|-------------------------------------------------------------------------------------------------------------------------------------|-------------|
| <b>Equation SD-1.</b> Closed-form solution to the Michaelis–Menten equation used to fit $[\text{Gluc}]_t$ (Eq. 3 in Goličnik) ..... | S2          |
| <b>Equation SD-2.</b> Lambert $W(x)$ approximation used to fit $[\text{Gluc}]_t$ (Eq. 11 in Goličnik).....                          | S2          |
| <b>Equation SD-3.</b> Second portion of Lambert $W(x)$ approximation used to fit $[\text{Gluc}]_t$ (Eq. 10 in Goličnik) .....       | S2          |
| <b>Equation SD-4.</b> Textual definition of Equation SD-1 (with inclusion of Eq. SD-2 and Eq. SD-3) .....                           | S2          |
| <b>Equation SD-5.</b> Closed-form solution to the Michaelis–Menten equation used to fit $[\text{ITC}]_t$ .....                      | S2          |
| <b>Equation SD-6.</b> Lambert $W(x)$ approximation used to fit $[\text{ITC}]_t$ (Eq. 7 in Goličnik) .....                           | S2          |
| <b>Equation SD-7.</b> Textual definition of Equation SD-5 (with inclusion of Eq. SD-1 and Eq. SD-6) .....                           | S2          |
| <b>Equation SD-8.</b> The Michaelis–Menten equation .....                                                                           | S2          |

$$[\text{Gluc}]_t = K_m W(x)$$

**Equation SD-1**

$$W(x) \cong (1 + \varepsilon) \left( \ln \left\{ \frac{6 \cdot x}{5 \cdot \ln[(12/5) \cdot (x/\ln(1 + (12/5) \cdot x))]} \right\} \right) - \varepsilon \left( \ln \left\{ \frac{2 \cdot x}{\ln(1 + 2 \cdot x)} \right\} \right)$$

**Equation SD-2**

$$x = \left( \frac{[\text{Gluc}]_0}{K_m} \right) \exp \left( \frac{[\text{Gluc}]_0 - V_{\max} \cdot t}{K_m} \right)$$

**Equation SD-3**

$$Y = (K_m) \cdot ((1 + 0.4586887) \cdot (\ln((6 \cdot ((Y_0/K_m) \cdot (\exp((Y_0 - (V_{\max} \cdot X))/K_m)))) / (5 \cdot \ln((12/5) \cdot ((Y_0/K_m) \cdot (\exp((Y_0 - (V_{\max} \cdot X))/K_m)))))) / \ln(1 + (12/5) \cdot ((Y_0/K_m) \cdot (\exp((Y_0 - (V_{\max} \cdot X))/K_m)))))) - (0.4586887 \cdot \ln((2 \cdot ((Y_0/K_m) \cdot (\exp((Y_0 - (V_{\max} \cdot X))/K_m)))) / \ln(1 + (2 \cdot ((Y_0/K_m) \cdot (\exp((Y_0 - (V_{\max} \cdot X))/K_m)))))))))$$

**Equation SD-4.** Textual definition of Equation SD-1 (with included Eq. SD-2 and Eq. SD-3) for use in calculating reaction progress curves for  $[\text{Gluc}]_t$  in GraphPad Prism 6.0 and other nonlinear regression software. This equation is based on Equation 7 with the improved Lambert  $W$  function (Equations 10-11) in Goličnik, M. *Anal. Biochem.* **2010**, 406, 94–96. Initial variable values for nonlinear regression were  $[\text{Gluc}]_0 = Y_0 = 500$ ,  $K_m = KM = 1.0$ , and  $V_{\max} = VMAX = 8.0$ .

$$[\text{ITC}]_t = [\text{nitrile}]_t = [\text{Gluc}]_0 - [\text{Gluc}]_t$$

**Equation SD-5**

$$Y = Y_0 - ((K_m) \cdot ((1 + 0.4586887) \cdot (\ln((6 \cdot ((Y_0/K_m) \cdot (\exp((Y_0 - (V_{\max} \cdot X))/K_m)))) / (5 \cdot \ln((12/5) \cdot ((Y_0/K_m) \cdot (\exp((Y_0 - (V_{\max} \cdot X))/K_m)))))) / \ln(1 + (12/5) \cdot ((Y_0/K_m) \cdot (\exp((Y_0 - (V_{\max} \cdot X))/K_m)))))) - (0.4586887 \cdot \ln((2 \cdot ((Y_0/K_m) \cdot (\exp((Y_0 - (V_{\max} \cdot X))/K_m)))) / \ln(1 + (2 \cdot ((Y_0/K_m) \cdot (\exp((Y_0 - (V_{\max} \cdot X))/K_m)))))))))$$

**Equation SD-6.** Textual definition of Eq. SD-5 (with included Eq. SD-1, Eq. SD-2, and Eq. SD-3) for use in calculating reaction progress curves for  $[\text{ITC}]_t$  or  $[\text{nitrile}]_t$  in GraphPad Prism 6.0 and other nonlinear regression software. This equation is based on Equation 7 from Goličnik, M. *Anal. Biochem.* **2010**, 406, 94–96. Initial variable values for nonlinear regression were  $[\text{Gluc}]_0 = Y_0 = 500$ ,  $K_m = KM = 1.0$ , and  $V_{\max} = VMAX = 8.0$ .

$$V_0 = - \frac{d[\text{Gluc}]}{dt} = \frac{V_{\max} \cdot [\text{Gluc}]_0}{K_m + [\text{Gluc}]_0}$$

**Equation SD-7.** The Michaelis–Menten equation.

$$Y = (K_m) \cdot ((1 + 0.4586887) \cdot (\ln((6 \cdot ((Y_0/K_m) \cdot (\exp((Y_0 - ((V_{\max} \cdot (\exp(-K_D \cdot X))) \cdot X))/K_m)))) / (5 \cdot \ln((12/5) \cdot ((Y_0/K_m) \cdot (\exp((Y_0 - ((V_{\max} \cdot (\exp(-K_D \cdot X))) \cdot X))/K_m)))))) / \ln(1 + (12/5) \cdot ((Y_0/K_m) \cdot (\exp((Y_0 - ((V_{\max} \cdot (\exp(-K_D \cdot X))) \cdot X))/K_m)))))) - (0.4586887 \cdot \ln((2 \cdot ((Y_0/K_m) \cdot (\exp((Y_0 - ((V_0 \cdot (\exp(-K_D \cdot X))) \cdot X))/K_m)))) / \ln(1 + (2 \cdot ((Y_0/K_m) \cdot (\exp((Y_0 - ((V_{\max} \cdot (\exp(-K_D \cdot X))) \cdot X))/K_m)))))))))$$

**Equation SD-8.** Textual definition of Eq. SD-1 (with included Eq. SD-2, Eq. SD-3, and Eq. 1) for use in calculating reaction progress curves of  $[\text{Gluc}]_t$  in GraphPad Prism 6.0 and other nonlinear regression software. This equation is based on Equation 7 with the improved Lambert  $W$  function (Equations 10-11) in Goličnik, M. *Anal. Biochem.* **2010**, 406, 94–96 and includes a term to account for the first-order denaturation of enzyme (Eq. 1). Initial variable values for nonlinear regression were  $[\text{Gluc}]_0 = Y_0 = 250$ ,  $K_m = KM = 500$ ,  $V_{\max} = VMAX = 8.0$ , and  $k_d = KD = 1 \times 10^{-7}$ . The following constraints were placed on nonlinear regression variables:  $Y_0 = 0-400$ ,  $KM = 0-1200$ ,  $VMAX = 0-50$ , and  $KD = 0-0.1$ .
